# Supplementary material for: Impacts of relaxed mask policies on COVID-19 epidemics: A modeling study in South Korea
Source: Research Square preprint supplement (doi:10.21203/rs.3.rs-6852152/v1), 2025-06-30
Supplement: Supplementary file 1 [file e8f8b58abd2a7b9223508f8b.docx]

**Supplementary Material 1** Mathematical formulation of the SEIVR model

**Supplementary Table S1** Estimated population immunity by age group at each policy adjustment point (%)

| **Policy Adjustment Point** | **Children**  **(0–17 yrs)** | **Adults**  **(18–59 yrs)** | **Older Adults (60+ yrs)** | **Total** |
| --- | --- | --- | --- | --- |
| PAP1 (2022. 5. 2) | 62.46 | 63.33 | 54.5 | 61.01 |
| PAP2 (2022. 9. 26) | 64.67 | 54.91 | 58.22 | 57.17 |
| PAP3 (2023. 1. 30) | 59.73 | 50.72 | 61.32 | 54.68 |
| PAP4 (2023. 3. 20) | 55.84 | 46.25 | 52.27 | 49.16 |
| PAP5 (2023. 6. 1) | 50.2 | 41.18 | 43.43 | 43.07 |

**Supplementary Table S2** Percent change in confirmed cases, severe cases, and deaths under counterfactual scenarios, by age group and policy adjustment point

Unit: Percent change (%)

| **Category** | **Policy adjustment point** | **2 Weeks Earlier** | | | **2 Weeks Later** | | |
| --- | --- | --- | --- | --- | --- | --- | --- |
| **0-17 yrs** | **18-59 yrs** | **60+ yrs** | **0-17 yrs** | **18-59 yrs** | **60+ yrs** |
| confirmed cases | PAP1 (2022. 5. 2.) | 14.07 | 17.63 | 17.43 | –26.72 | –24.02 | –19.23 |
| PAP2 (2022. 9. 26.) | 17.4 | 18.54 | 18.91 | –22.40 | –21.96 | –16.32 |
| PAP3 (2023. 1. 30.) | 20.33 | 17.83 | 17.98 | –13.88 | –16.69 | –10.62 |
| PAP4 (2023. 3. 20.) | 29.51 | 16.25 | 25.22 | –23.80 | –22.81 | –10.69 |
| PAP5 (2023. 6. 1.) | 0 | 0 | 0 | 0 | 0 | 0 |
| Severe cases | PAP1 (2022. 5. 2.) | 17.65 | 18.05 | 17.41 | –30.00 | –22.22 | –19.31 |
| PAP2 (2022. 9. 26.) | 0 | –14.63 | 13.76 | –19.51 | –15.48 | –14.46 |
| PAP3 (2023. 1. 30.) | 20 | 19.18 | 18.94 | –50.00 | –18.18 | –19.10 |
| PAP4 (2023. 3. 20.) | 0 | 0 | 0 | 0 | 0 | 0 |
| PAP5 (2023. 6. 1.) | 0 | 16.67 | 18.64 | –50.00 | 0 | –23.53 |
| Deaths | PAP1 (2022. 5. 2.) | 17.65 | 18.05 | 17.41 | –30.00 | –22.22 | –19.31 |
| PAP2 (2022. 9. 26.) | 18.18 | 17.95 | 18.35 | –20.00 | –16.04 | –14.81 |
| PAP3 (2023. 1. 30.) | 0 | 21.05 | 17.9 | –50.00 | –18.18 | –19.10 |
| PAP4 (2023. 3. 20.) | 0 | 0 | 0 | 0 | 0 | 0 |
| PAP5 (2023. 6. 1.) | 0 | 50 | 16.67 | –50.00 | 0 | –23.53 |
